# Supplementary material
Source: PubMed Central journal article supplement (PMC3582836)
Supplement: NIHMS413844-supplement-01.pdf [file NIHMS413844-supplement-01.pdf]

## **Multiple Regulatory Variants Modulate Expression of 5-Hydroxytryptamine 2A Receptors in Human Cortex**

### ***Supplemental Information***

#### **Supplemental Methods**

##### **Immunohistochemistry**

HEK293 cells were grown in complete media (DMEM/F12 50:50 supplemented with 10% fetal bovine serum and 1% penicillin/streptomycin) at 37°C in 4-well Lab-Tek II chamber slides (Thermo Fisher Scientific, Inc.) coated in BD Matrigel (BD Biosciences) and transfected in antibiotic-free complete media with 500 ng of construct using Lipofectamine 2000 (Life Technologies, Inc.), following manufacturer protocol. After 6 hours, the antibiotic-free media was replaced with complete media to prevent infection. Twenty-four hours after transfection, complete cell media was replaced with serum-free media and cells were incubated for 3.5 hours, after which additional media was added containing no 5-HT (serum-starved) or 1 uM 5-HT (final concentration) and incubated for 30 minutes. Immediately following, cells were lightly washed in warm Dulbecco's phosphate-buffered saline (DPBS) and fixed in 4% paraformaldehyde for 20 minutes. Following fixation, cells were again washed in DPBS and permeabilized by incubation with 0.1% Triton-X diluted in PBS for 10 minutes on ice. Cells were then blocked in 10% goat serum for one hour at room temperature and subsequently incubated with primary antibodies overnight at 4°C (SR-2A (H-75) rabbit anti-human polyclonal (Santa Cruz Biotechnology, Inc.) diluted 1:150 for 5-HT<sub>2A</sub> and c-Myc (9E10) mouse anti-human monoclonal (Santa Cruz) 1:400 for c-Myc in 2% goat serum/DPBS). The next day, cells were washed in DPBS three times for 5 minutes and incubated in secondary antibody (Alexa Fluor 488 goat anti-mouse or Alexa Fluor 568 goat anti-rabbit (Life Technologies, Inc.) each diluted 1:1000 in 2% goat serum/PBS) and DRAQ5 (eBioscience, Inc.) nuclear counterstain (diluted 1:1000). Finally, cells were washed in PBS three times for 5 minutes and coverslipped with 90% glycerol.

##### **CpG Methylation in Human Prefrontal Cortex**

Genomic DNA from 223 dorsolateral prefrontal cortex samples was isolated with phenol-chloroform, bisulfite converted with the EZ DNA methylation kit (Zymo Research Corp., Irvine, CA) and methylation status measured with the Infinium HumanMethylation27 BeadChips (Illumina, Inc., San Diego, CA). Single nucleotide polymorphism genotypes extending 100 kb

upstream and downstream of the *HTR2A* gene locus, measured using HumanHap650Y\_V3 or Human 1M-Duo\_V3 BeadChips (Illumina, Inc.), were regressed against methylation status of a CpG site in exon 2 of *HTR2A* (chr13:47,469,654 of build GRCh37/hg19), while accounting for age, sex, and race.

### **HTR2A Untranslated Region (UTR) Cloning**

Short (sUTR), medium (mUTR), and long 5'UTR (lUTR) amplicons were polymerase chain reaction amplified (primers in Table S2) from a single complementary DNA sample homozygous for the WT sequence of the 5'UTR and inserted immediately adjacent to the luciferase start codon in the pGL4.23 luc2/minP luciferase vector (Promega Corp., Madison, WI) using Clontech In-Fusion HD cloning (Takara Bio, Inc., Mountain View, CA). Primers for the UTR amplicons, corresponding to the UTR transcription start sites (TSS), were -2368 (lUTR), -1128 (mUTR), and -328 (sUTR) base pairs upstream of the translation start codon for 5-HT<sub>2A</sub>, each paired a common reverse primer beginning at the -1 position. The UTR lengths correspond to TSS observed in our transcriptome sequencing study and those mapped in the UCSC Genome Browser (1), supported by previous studies (2,3) and *in silico* analysis of TSS by Eponine (4). rs6311/A was introduced into the lUTR construct using QuikChange II XL Site-Directed Mutagenesis (Agilent).

### **Clinical Associations with STAR\*D**

Statistical analyses considered these potential covariates: sex, race, age at study entry, current marital status, years of schooling, highest degree obtained, current employment status, weight change immediately prior to study entry, total weight change after study entry, menopausal/post-hysterectomy, final study citalopram dose, initial Quick Inventory of Depressive Symptomatology (QIDS) score, treatment-emergent suicidal ideation phenotype (ref), pre-existing conditions and severity from the Cumulative Illness Rating Scale (see Table S4 for specific conditions), and cumulative side effects experienced. We tested the following outcome variables for STAR\*D Level 1 (statistical test performed): depression severity (univariate analysis of variance for initial QIDS), change in depression score (repeated-measures analysis of variance for initial versus final QIDS score), and all self-reported side effects on the Patient Rated Inventory of Side Effects (see Table S4 for specific side effects) (case/control logistic regression). For side effects, patients were scored as cases if they reported experiencing the side effect at any point during treatment.

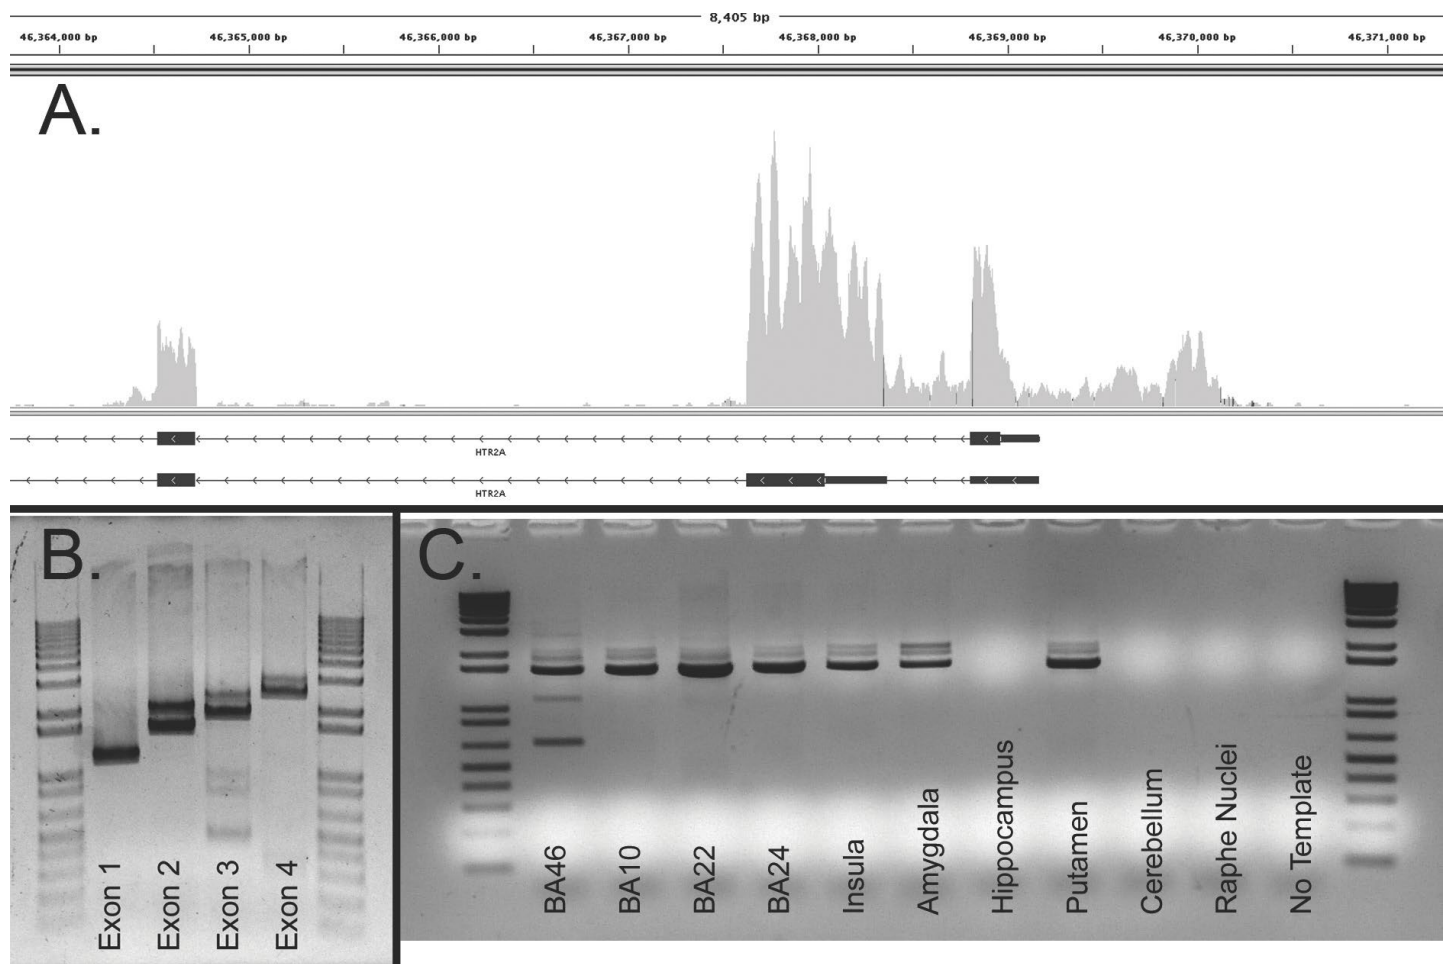

**Figure S1.** *HTR2A* 5'UTR usage in human brain. **(A)** Massively parallel sequencing reads from a single representative BA46 sample. Read depth is represented as a histogram above the annotated *HTR2A* gene, encoded right to left. **(B)** PCR amplification of PFC cDNA from the extended 5'UTR into exons 1, 2, 3, or 4 confirms mRNAs constituting the extended 5'UTR and all coding exons. The less abundant higher molecular weight band in exon 2-4 reactions represent retention of intron 1, as confirmed by Sanger sequencing and observed in RNA-Seq. Sizes for each amplicon match predicted sizes for mature mRNA plus the unspliced extended 5'UTR (Exon 1 = 1191bp, Exon 2 = 1615bp, Exon 3 = 1907bp, Exon 4 = 2459bp). **(C)** PCR amplification of the extended 5'UTR through exon 2 in multiple brain regions. Most brain regions express the extended 5'UTR, although we find no evidence of expression in the hippocampus, cerebellum, or Raphe nuclei. Again, in all regions where expression is observed, we also see evidence of intron 1 retention. BA, Brodmann area; cDNA, complementary DNA; mRNA, messenger RNA; PCR, polymerase chain reaction; PFC, prefrontal cortex; UTR, untranslated region.

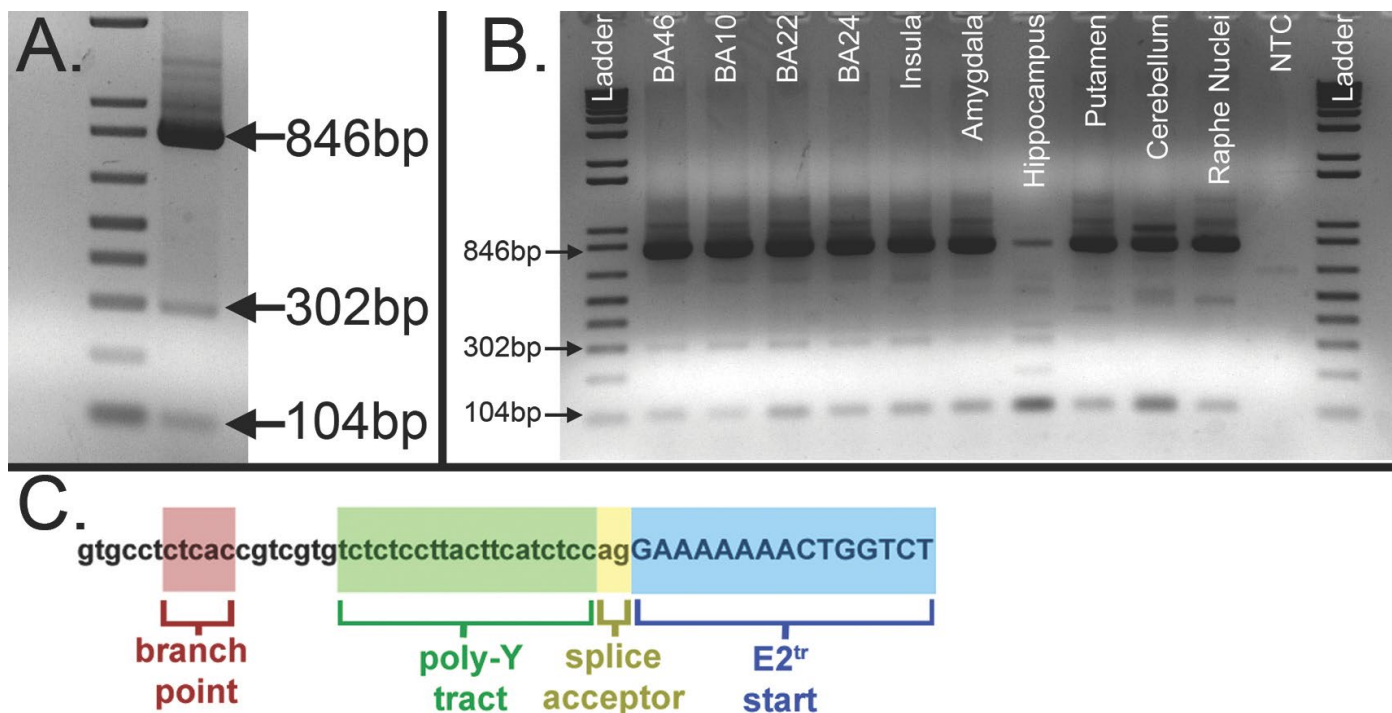

**Figure S2.** Alternative exon 2 splicing of *HTR2A* in human brain. **(A)** Exon 2 splice variants observed by PCR amplification of BA46 samples. The lanes correspond to a no template control, 1kb Plus DNA Ladder (Invitrogen), and cDNA from a single representative sample amplified using primers in exon 1 and 3, respectively. The full-length E2<sup>+</sup> variant (846bp) is most abundantly expressed, but E2<sup>tr</sup> (302bp) and E2<sup>-</sup> (104bp) are also apparent. **(B)** Exon 2 splice variant expression in ten different brain regions. Most brain regions express all three splice variants identified in BA46. However, the relative expression varies greatly in the hippocampus, and other regions appear to express uncharacterized novel splice variants (putamen, cerebellum, Raphe nuclei). **(C)** *Cis*-regulatory elements adjacent to the E2<sup>tr</sup> alternative exon 2 in genomic DNA. BA, Brodmann area; cDNA, complementary DNA; NTC, no template control; PCR, polymerase chain reaction.



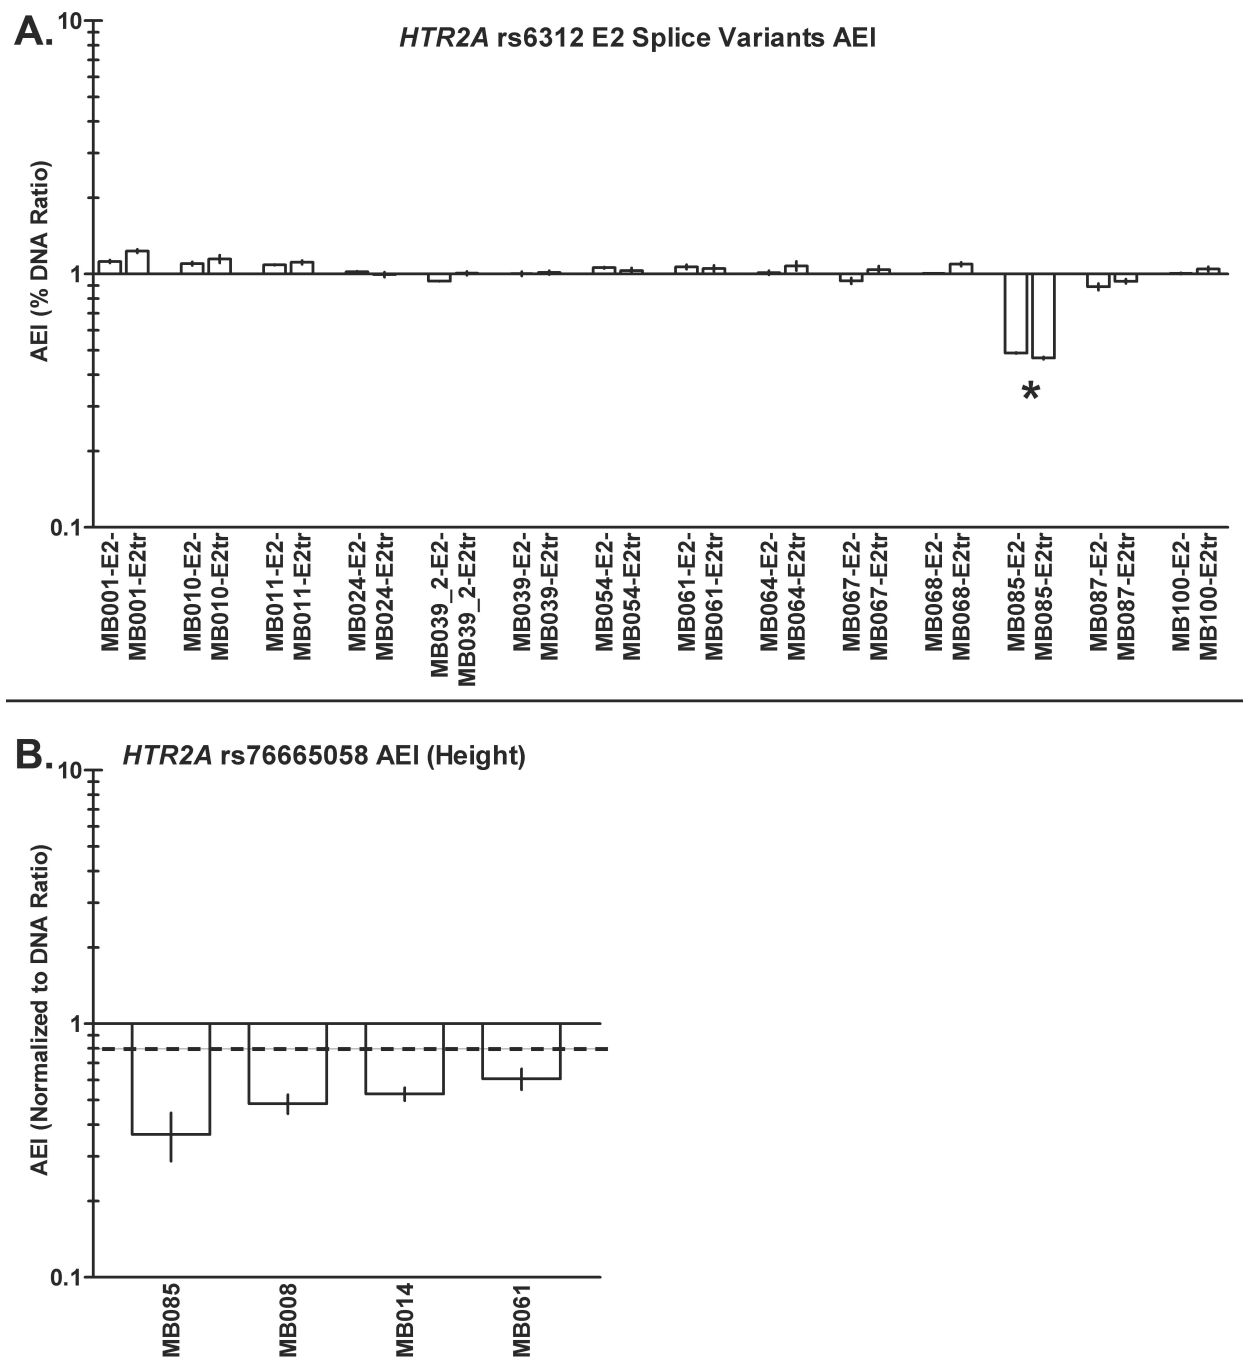

**Figure S3.** (A) AEI for exon 2 splice variants. Sample MB085 (\*) displayed significant AEI for both E2<sup>tr</sup> and E2<sup>r</sup> splice variants, whereby the major allele of rs6312 express 2-fold less mRNA compared to the minor allele. (B) AEI for the 3'UTR SNP rs76665058. All samples heterozygous for rs76665058 display significant AEI ranging from 1.6 to 2.7-fold differences across alleles. The dotted line represents 2 standard deviations of within-sample variability. AEI, allelic expression imbalance; SNP, single nucleotide polymorphism; UTR, untranslated region.

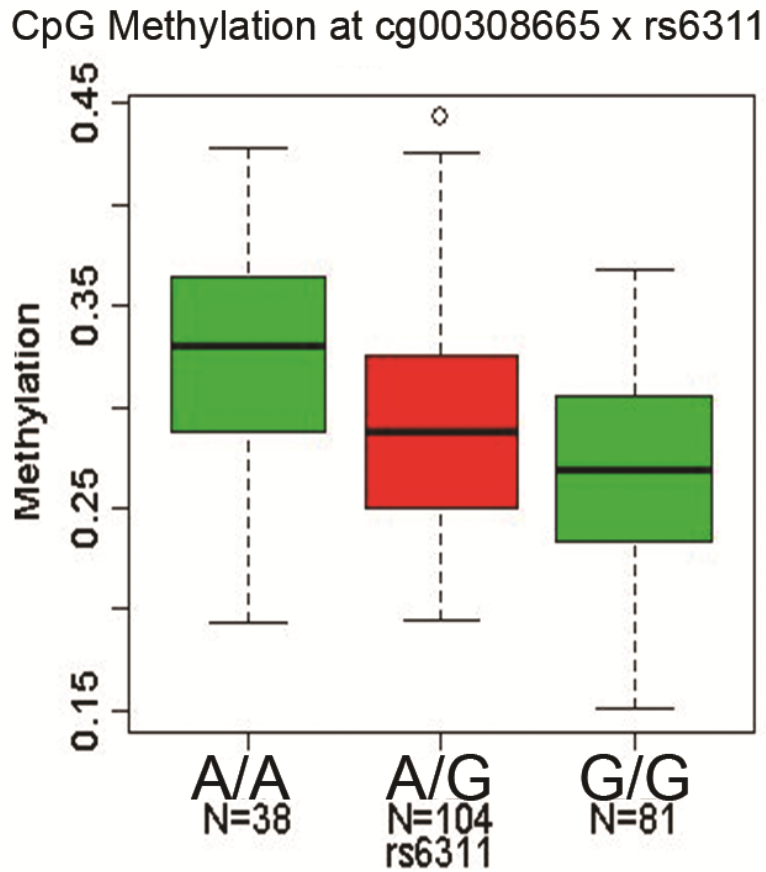

**Figure S4.** CpG methylation status in *HTR2A* across rs6311 genotype. Homozygous A/A minor allele carriers of rs6311 had a significantly higher percentage of CpG methylation at cg00308665 (chr13:47,469,654 of build GRCh37/hg19) compared to homozygous G/G major allele carriers ( $p = 6.34 \times 10^{-7}$ ).

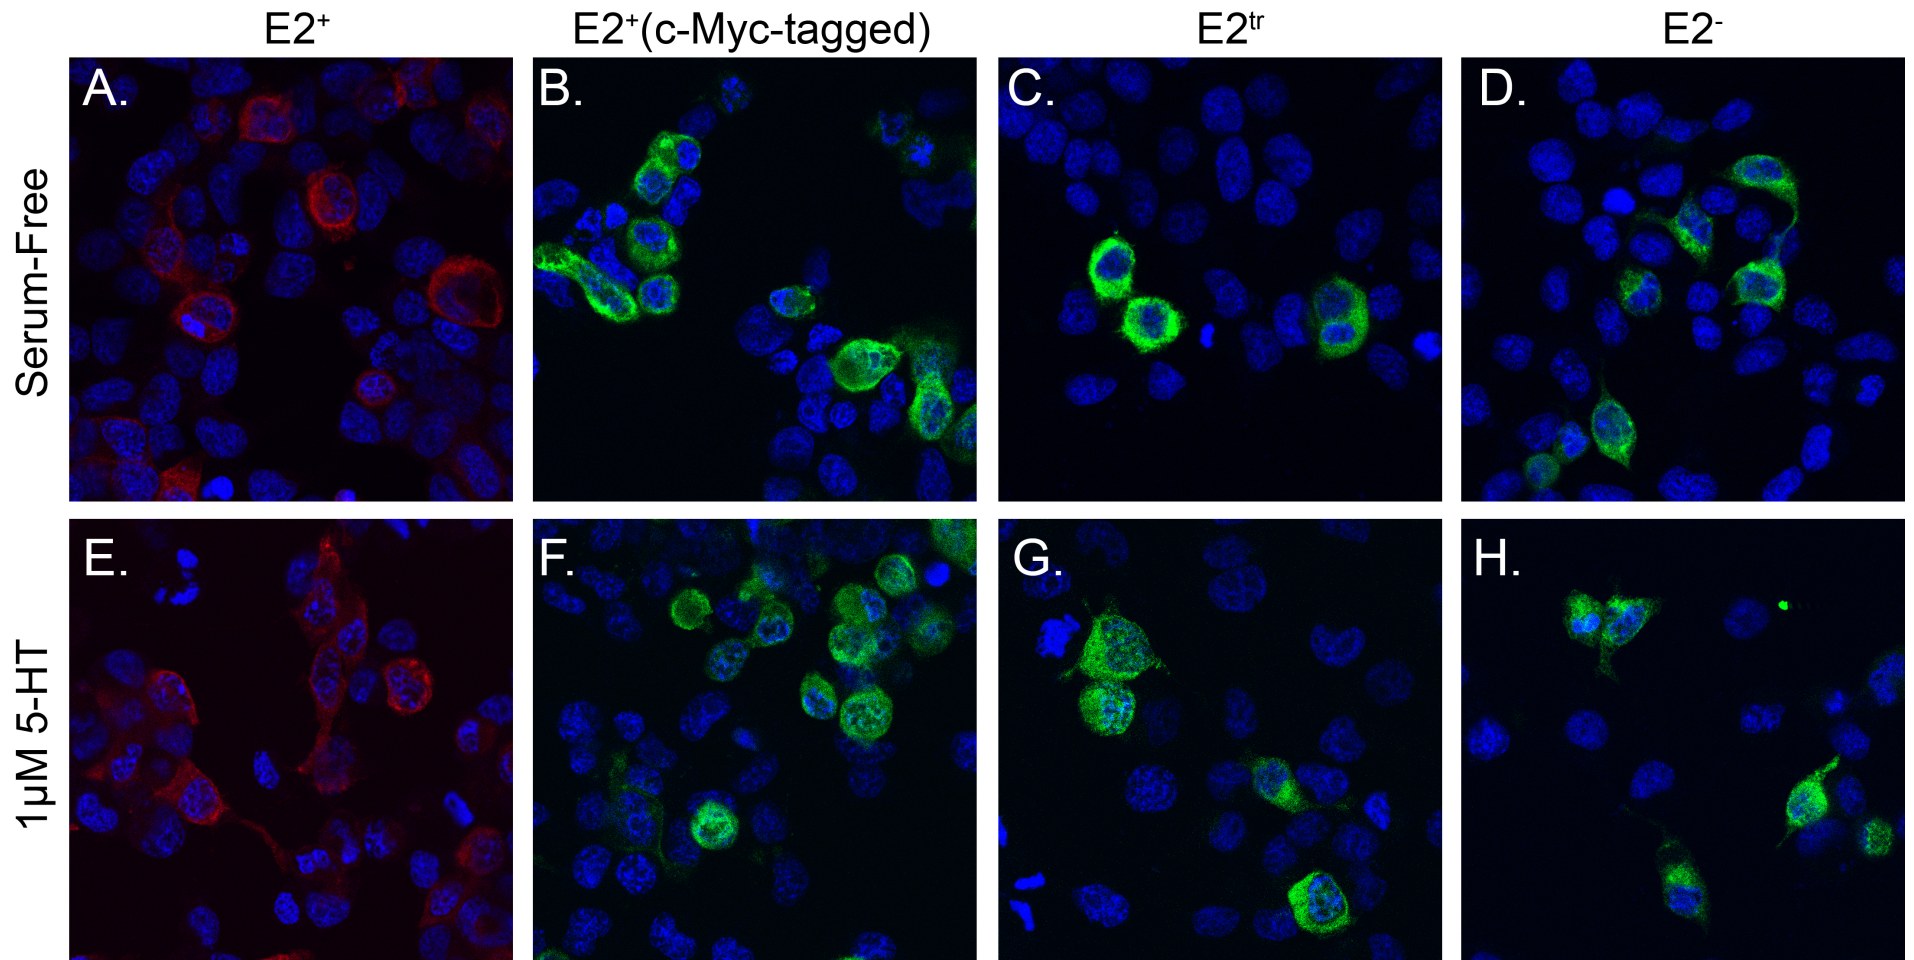

**Figure S5.** Immunohistochemical staining of exon 2 splice variants overexpressed in HEK293 cells following serum starvation and reintroduction of 5-HT. Following serum starvation, which removes 5-HT from the cell media, staining for the E2<sup>+</sup> isoform appears more pronounced on the cell surface (**A,B**), although it is also evident in the cytoplasm. Reintroduction of 5-HT into the media appears to decrease membrane expression of E2<sup>+</sup> (**E,F**). Truncated splice variants appear to be more evenly distributed throughout the cytoplasm under serum-free conditions (**C,D**) and the distribution does not change in response to 5-HT (**G,H**).

**Table S1.** Brain Tissue Demographics

| <b>Total Cohort</b>                                   |                  |                             |                             |                        |                        |
|-------------------------------------------------------|------------------|-----------------------------|-----------------------------|------------------------|------------------------|
| <b>Race (n)</b>                                       | <b>Sex (M:F)</b> | <b>Age Yrs. (Avg. ± SD)</b> | <b>PMI Hrs. (Avg. ± SD)</b> | <b>RIN (Avg. ± SD)</b> | <b>Cocaine:Control</b> |
| Caucasian (46)                                        | 31:15            | 41.4 ± 12.7                 | 14.4 ± 5.2                  | 7.7 ± 0.8              | 21:25                  |
| African-American (12)                                 | 12:0             | 28.4 ± 7.0                  | 16.5 ± 5.0                  | 7.6 ± 0.9              | 5:7                    |
| Mixed/Other <sup>a</sup> (16)                         | 8:8              | 43.9 ± 15.5                 | 17.9 ± 4.2                  | 7.4 ± 1.0              | 4:12                   |
| Total (74)                                            | 51:23            | 39.8 ± 13.5                 | 15.5 ± 5.1                  | 7.6 ± 0.9              | 30:44                  |
| <b>Prefrontal Cortex (BA46) Transcriptome Samples</b> |                  |                             |                             |                        |                        |
| Caucasian (8)                                         | 6:2              | 35.0 ± 5.1                  | 12.6 ± 4.1                  | 7.8 ± 0.8              | 4:4                    |
| African-American (1)                                  | 1:0              | 25.0                        | 20.5                        | 8.2                    | 0:1                    |
| Mixed/Other <sup>a</sup> (1)                          | 0:1              | 32.0                        | 16.0                        | 9.4                    | 1:0                    |
| <b>Brain Region Transcriptome Survey<sup>b</sup></b>  |                  |                             |                             |                        |                        |
| African-American                                      | Male             | 20                          | 12                          | 5.0-7.1                | Control                |

Avg., average; BA, Brodmann area; F, female; M, male; PMI, post-mortem interval; RIN, RNA integrity number.

<sup>a</sup> Includes both mixed race and Hispanic tissues.

<sup>b</sup> Tissues originated from different regions in the same individual, including frontopolar cortex (BA10), Wernicke's Area (BA22), ventral anterior cingulate cortex (BA24), insular cortex, amygdala, hippocampus, putamen, cerebellum, and pontine raphe nuclei.

**Table S2.** Primers Used in the Current Study

| Primer             | Region           | Assay                                      | Sequence (5' --> 3')              |
|--------------------|------------------|--------------------------------------------|-----------------------------------|
| rs4941575 Seq F    | Upstream         | sequencing                                 | TCTGGCTTGTTCCAAACCTAAGT           |
| rs4941575 Seq R    | Upstream         | sequencing                                 | CAGAGCTTCTAGGTTAATAGCATGAGG       |
| rs73175539 Seq F   | Upstream         | sequencing                                 | TCTCAGATCAACACCGGCAG              |
| rs73175539 Seq R   | Upstream         | sequencing                                 | TGGTTACTCTCCCAGTCAGCC             |
| rs731244 Seq F     | Upstream         | sequencing                                 | GCCTGCTCGCCAGCGT                  |
| rs731244 Seq R     | Intron 1         | sequencing                                 | AAGATTAGCAGACAACCTTCTCC           |
| rs1328685 F        | 5'UTR            | SNaPshot, genotyping                       | CTTGGCCACAAACATATTGAAGG           |
| rs1328685 R        | 5'UTR            | SNaPshot, genotyping, cDNA synthesis       | TGGGTTTTGCTACAGTTCTATCACC         |
| rs1328685 PER      | 5'UTR            | SNaPshot <sup>1</sup> , genotyping         | TTCTGTTCTTCACATTCTCCCT            |
| rs6311 F           | 5'UTR            | SNaPshot                                   | GTAATCCACTCTGGACACAAACACT         |
| rs6311 R           | 5'UTR            | SNaPshot, cDNA synthesis                   | AATTTTTTAGGCTGAAGGGTGAAG          |
| rs6311 PEF         | 5'UTR            | SNaPshot <sup>1</sup>                      | GCTTTGGATGGAAGTGCC                |
| rs6311 RFLP F      | 5'UTR            | genotyping                                 | TTCCACTCCGGACACAAACACTGT          |
| rs6311 RFLP R      | 5'UTR            | genotyping                                 | [6FAM]CCCATTAAGGTAGGTAAGTGGCACTGT |
| rs6312 Seq F       | Exon 1           | sequencing                                 | AGCTGGCTCAGCTCTTGCA               |
| rs6312 Seq R       | Intron 2         | sequencing                                 | TCCTGAAGGCTGGAATATTGG             |
| rs6312 F           | Exon 1           | SNaPshot, genotyping                       | CTGTGAGAGATGCAGCGAGTC             |
| rs6312 R           | Intron 1         | SNaPshot, genotyping                       | AAGCATGATTTCAAACCGGAA             |
| rs6312 PEF         | Exon 1           | SNaPshot <sup>1</sup> , genotyping         | GAATAACAAATGTATCTCATGTGTG         |
| rs6313 F           | Exon 2           | qPCR, SNaPshot, genotyping                 | CTCAACTACGAACTCCCTAATGCAA         |
| rs6313 R           | Exon 2           | qPCR, SNaPshot, genotyping, cDNA synthesis | TTGGTTCGATTTTCAGAGTCGA            |
| rs6313 PER         | Exon 2           | SNaPshot <sup>1</sup> , genotyping         | CATCAGAAGTGTTAGCTTCTCC            |
| E3 Splice R        | Exon 3           | exon 2 splicing, cDNA synthesis            | CCAGACTGCACAAAGCTTGC              |
| E1 Splice F        | Exon 1           | exon 2 splicing, qPCR                      | CTGTGAGAGATGCAGCGAGTC             |
| E2 <sup>+</sup> R  | Exon 2 – Exon 1  | qPCR                                       | TCGGGAAGATAAATGTCAATTTGTC         |
| E2 <sup>-</sup> R  | Exon 3 – Exon 1  | qPCR                                       | GCCACCGGTACCATTTGTC               |
| E2 <sup>tr</sup> R | Exon 2tr – Exon1 | qPCR                                       | CAGACCAGTTTTTTTCATTTGTCTTC        |

|                       |          |                                            |                                     |
|-----------------------|----------|--------------------------------------------|-------------------------------------|
| rs2070040 Seq F       | Intron 2 | sequencing                                 | CATGATTTAATTGGGCTGGGT               |
| rs2070040 Seq R       | Intron 3 | sequencing                                 | TCCCTCCAAGCTACAGCACAT               |
| rs6304 RFLP F         | Exon 3   | genotyping                                 | CGCCATCCAGAATCCCATC                 |
| rs6304 RFLP R         | Exon 3   | genotyping                                 | [HEX]GCACGAACTGTCATTTCAAATGA        |
| rs1328684 RFLP F      | Intron 3 | genotyping                                 | CTACTGTTTTGGGTGGTGCAAG              |
| rs1328684 RFLP R      | Intron 3 | genotyping                                 | [6FAM]CAAAGTGGTCTGCATCCTTACGT       |
| rs2760351 F           | Intron 3 | SNaPshot, genotyping                       | CCCTGCTTCATCCCTGGT                  |
| rs2760351 R           | Intron 3 | SNaPshot, genotyping                       | GGTATTTGCATTTATTTCAAATCTTTTCT       |
| rs2760351 PEF         | Intron 3 | SNaPshot <sup>1</sup> , genotyping         | GCTCTCCTATCTTTTGTAAAGAGTAC          |
| rs655888 F            | Intron 3 | SNaPshot, genotyping                       | TCCACTCTACTTCCAATCCTGAAA            |
| rs655888 R            | Intron 3 | SNaPshot, genotyping                       | AAATACCCATGCTACCGATGACT             |
| rs655888 PER          | Intron 3 | SNaPshot <sup>1</sup> , genotyping         | GACCCCCCAGCTCAGTC                   |
| Antisense PreAmp F    | Intron 3 | qPCR, sequencing                           | ACCTTGGTTTTGGCCTGGTG                |
| Antisense PreAmp R    | Intron 3 | qPCR, sequencing                           | AAATACCCATGCTACCGATGACT             |
| Antisense Nested F    | Intron 3 | qPCR, sequencing                           | GACTTTTCACTTCCAAAAGTGTAA            |
| Antisense Nested R    | Intron 3 | qPCR, sequencing                           | CAGGATTGGAAGTAGAGTGGAGTTG           |
| rs7330461 F AS Short  | Intron 3 | genotyping                                 | ACCCTCAGAGACCCaGCa                  |
| rs7330461 F AS Long   | Intron 3 | genotyping                                 | aaaaACCCTCAGAGACCCgGct              |
| rs7330461 R Common    | Intron 3 | genotyping                                 | GAGAGGTCAGCAGAGCCACAT               |
| rs7997012 Seq F       | Intron 3 | sequencing                                 | CTTTCTAATCAATGAGCAACTGTGC           |
| rs7997012 Seq R       | Intron 3 | sequencing                                 | AAAAAAGAGAGGAAACATGAATCAAGTA        |
| rs6314 F <sup>2</sup> | Exon 4   | qPCR, SNaPshot, genotyping                 | GCAAGATGCCAAGACAACAGATAA            |
| rs6314 R <sup>2</sup> | Exon 4   | qPCR, SNaPshot, genotyping, cDNA synthesis | TCACACACAGCTCACCTTTTCAT             |
| rs6314 PEF            | Exon 4   | SNaPshot <sup>1</sup> , genotyping         | TGGTTGCTCTAGGAAAGCAG                |
| rs3803189 F           | 3'UTR    | SNaPshot                                   | GCAATACAGATTTTATAACTGACCTTAGT       |
| rs3803189 R           | 3'UTR    | SNaPshot, cDNA synthesis                   | GATGACATGGGATTGAGTTGGTTAC           |
| rs3803189 PEF         | 3'UTR    | SNaPshot <sup>1</sup>                      | CCATTATATTCAATAAAATTTTCACTATT       |
| rs3803189 F Common    | 3'UTR    | genotyping                                 | [HEX]TGGAACCTTGCTGCTATGCT           |
| rs3803189 R AS Short  | 3'UTR    | genotyping                                 | GCCATTATATTCAATAAAATTTTCACTtTTg     |
| rs3803189 R AS Long   | 3'UTR    | genotyping                                 | ttaaGCCATTATATTCAATAAAATTTTCACTAcTt |

|                      |                 |                                      |                                            |
|----------------------|-----------------|--------------------------------------|--------------------------------------------|
| rs7324017 F          | 3'UTR           | SNaPshot, genotyping                 | GGAAGTGCATTGTGTAATTTGGAA                   |
| rs7324017 R          | 3'UTR           | SNaPshot, genotyping, cDNA synthesis | GGAGTAGTTCAGTTCAAATGCAGC                   |
| rs7324017 PEF        | 3'UTR           | SNaPshot <sup>1</sup> , genotyping   | GATATGTTGAAAGATGGTTCCT                     |
| rs73473857 F         | 3'UTR           | SNaPshot                             | ATATGGACGAAAAGCAAGTCAATG                   |
| rs73473857 R         | 3'UTR           | SNaPshot, cDNA synthesis             | TTGCAGCAATGGAAGGTCATAG                     |
| rs73473857 PER       | 3'UTR           | SNaPshot <sup>1</sup>                | TAAATAAACATGATACAAACATGCAC                 |
| rs73473857 RFLP F    | 3'UTR           | genotyping                           | AAAAGCAAGTCAATGAAAACACTCAGTA               |
| rs73473857 RFLP R    | 3'UTR           | genotyping                           | [HEX]TCTTCCACAAAATTAGATTAATTTCCAG          |
| rs61948307 F         | 3'UTR           | SNaPshot                             | CCAAATTGAACTAAGTCACTGTACTGCT               |
| rs61948307 R         | 3'UTR           | SNaPshot                             | TTTTGAGTCTACTTTATTTACAGTTATTTATCCTTT       |
| rs61948307 PEF       | 3'UTR           | SNaPshot <sup>1</sup>                | AACTTATTTTAATCAAGGCGATG                    |
| rs61948307 RFLP F    | 3'UTR           | genotyping                           | TTTTATGAACTTATTTTAATCAAGGCGAT              |
| rs61948307 RFLP R    | 3'UTR           | genotyping                           | [6FAM]GTTCTGAGTCTGATGACCTGGAAGA            |
| rs76665058 F         | 3'UTR           | SNaPshot, genotyping                 | AATGAATGAATTTTGTGTGAGTCCA                  |
| rs76665058 R         | 3'UTR           | SNaPshot, genotyping, cDNA synthesis | TGCTCTCGAATATCAGGATGATACC                  |
| rs76665058 PER       | 3'UTR           | SNaPshot <sup>1</sup> , genotyping   | ATTCCGTTTAGTAGACACAGCT                     |
| pGL4.23 Luc F        | Luciferase gene | qPCR                                 | ACGGTAAAACCATGACCGAGA                      |
| pGL4.23 Luc R        | Luciferase gene | qPCR                                 | TTGCCGGTCAGTCCTTTAGG                       |
| pGL4.23 sUTR F       | short UTR       | qPCR                                 | CTTTTTTGCCTCGGTTTGGTG                      |
| pGL4.23 sUTR R       | short UTR       | qPCR                                 | AAAGAACTGAACTGTGGTGGCTG                    |
| pGL4.23 mUTR F       | medium UTR      | qPCR                                 | AGCTGGCTCAGCTCTTGCAT                       |
| pGL4.23 mUTR R       | medium UTR      | qPCR                                 | TGTGACTCGCTGCATCTCTCA                      |
| pGL4.23 lUTR F       | long UTR        | qPCR                                 | GAAGAGTCGCGGATAACAGCA                      |
| pGL4.23 lUTR R       | long UTR        | qPCR                                 | CCTTGACCTCAGCATCTTCCC                      |
| pGL4.23 sUTR Clone F | short UTR       | cloning                              | GGTAAAGCCACCATGGGACATTTATCTTCCCGAGCGCT     |
| pGL4.23 mUTR Clone F | medium UTR      | cloning                              | GGTAAAGCCACCATGGGTGGAAACCAGGAGTCCCTTG      |
| pGL4.23 lUTR Clone F | long UTR        | cloning                              | GGTAAAGCCACCATGGTGATAGAGCTAGGATCCAAAACCAAG |
| pGL4.23 Common R     | pGL4.23 clone   | cloning                              | TTGGCATCTTCCATGGGTCTAAGCCAGAAGTGTAGCAGATGA |

cDNA, complementary DNA; qPCR, quantitative polymerase chain reaction; UTR, untranslated region.

<sup>1</sup>Primer used only in primer extension SNaPshot reaction.

<sup>2</sup>Primer used for estimation of total *HTR2A* via qPCR.



**Table S3.** Luciferase Activity and mRNA Expression for Estimating Translation Efficiency

| Cell Line | Construct – Replicate | Luc RLU Avg. | Luc RLU SD | Luc CT Avg. | Luc CT SD | RLU/Transformed CT Avg. <sup>a</sup> | RLU/Transformed CT SD <sup>a</sup> | % of NoUTR | Construct | Avg. % NoUTR |
|-----------|-----------------------|--------------|------------|-------------|-----------|--------------------------------------|------------------------------------|------------|-----------|--------------|
| HEK293T   | NoVector – 1          | 49.25        | 6.65       | -           | -         | -                                    | -                                  | -          | No Vector | -            |
| HEK293T   | NoVector – 2          | 47.75        | 4.19       | -           | -         | -                                    | -                                  | -          |           |              |
| HEK293T   | sUTR – 1              | 3358.00      | 284.75     | 21.06       | 0.32      | 72.57                                | 7.23                               | 0.07       | sUTR      | <b>0.05</b>  |
| HEK293T   | sUTR – 2              | 2892.00      | 265.83     | 20.31       | 0.33      | 37.84                                | 4.14                               | 0.03       |           |              |
| HEK293T   | mUTR – 1              | 1910.75      | 70.13      | 22.09       | 0.12      | 85.03                                | 3.78                               | 0.08       | mUTR      | <b>0.05</b>  |
| HEK293T   | mUTR – 2              | 2243.00      | 311.06     | 20.52       | 0.25      | 33.90                                | 5.74                               | 0.03       |           |              |
| HEK293T   | IUTRG – 1             | 3331.00      | 610.65     | 21.53       | 0.21      | 99.66                                | 22.45                              | 0.09       | IUTRG     | <b>0.13</b>  |
| HEK293T   | IUTRG – 2             | 6813.25      | 553.47     | 21.44       | 0.08      | 190.31                               | 17.24                              | 0.17       |           |              |
| HEK293T   | IUTRA – 1             | 8297.00      | 315.00     | 21.75       | 0.43      | 288.60                               | 10.81                              | 0.26       | IUTRA     | <b>0.16</b>  |
| HEK293T   | IUTRA – 2             | 7446.50      | 608.17     | 19.76       | 0.19      | 64.80                                | 5.56                               | 0.06       |           |              |
| HEK293T   | NoUTR – 1             | 2719.75      | 128.40     | 25.12       | 0.27      | 999.38                               | 51.80                              | 0.91       | No UTR    | <b>1.00</b>  |
| HEK293T   | NoUTR – 2             | 2931.50      | 234.69     | 25.32       | 0.23      | 1204.26                              | 108.75                             | 1.09       |           |              |
| SH-SY5Y   | NoVector – 1          | 432.00       | 62.54      | -           | -         | -                                    | -                                  | -          | No Vector | -            |
| SH-SY5Y   | NoVector – 2          | 379.25       | 23.33      | -           | -         | -                                    | -                                  | -          |           |              |
| SH-SY5Y   | sUTR – 1              | 949.50       | 5.07       | 22.68       | 0.48      | 63.81                                | 0.22                               | 0.04       | sUTR      | <b>0.03</b>  |
| SH-SY5Y   | sUTR – 2              | 1298.25      | 15.28      | 21.78       | 0.10      | 46.41                                | 0.34                               | 0.03       |           |              |
| SH-SY5Y   | mUTR – 1              | 1144.50      | 44.19      | 23.83       | 0.08      | 170.00                               | 8.02                               | 0.10       | mUTR      | <b>0.11</b>  |
| SH-SY5Y   | mUTR – 2              | 1032.25      | 72.41      | 24.32       | 0.06      | 214.19                               | 17.58                              | 0.13       |           |              |
| SH-SY5Y   | IUTRG – 1             | 990.50       | 23.27      | 23.78       | 0.27      | 142.31                               | 3.74                               | 0.08       | IUTRG     | <b>0.11</b>  |
| SH-SY5Y   | IUTRG – 2             | 1198.25      | 21.31      | 24.12       | 0.42      | 219.05                               | 4.77                               | 0.13       |           |              |
| SH-SY5Y   | IUTRA – 1             | 1056.00      | 44.31      | 25.23       | 0.21      | 414.04                               | 20.51                              | 0.24       | IUTRA     | <b>0.16</b>  |
| SH-SY5Y   | IUTRA – 2             | 780.00       | 19.41      | 24.04       | 0.08      | 133.31                               | 3.42                               | 0.08       |           |              |
| SH-SY5Y   | NoUTR – 1             | 1149.50      | 92.59      | 26.80       | 0.66      | 1356.18                              | 130.55                             | 0.80       | No UTR    | <b>1.00</b>  |
| SH-SY5Y   | NoUTR – 2             | 1528.75      | 73.83      | 27.02       | 0.08      | 2046.62                              | 100.01                             | 1.20       |           |              |

Avg., average; CT, quantitative polymerase chain reaction cycle threshold; IUTRA, long UTR rs6311 A allele; IUTRG, long UTR rs6311 G allele; Luc, luciferase; mRNA, messenger RNA; mUTR, medium UTR; RLU, relative light units; sUTR, short UTR; UTR, untranslated region.

<sup>a</sup>CT values transformed using the following formula:  $(1/2^{CT}) * 10000000$



**Table S4.** Demographics, Covariates<sup>a</sup>, Pre-Existing Conditions<sup>b</sup>, and Side Effects<sup>c</sup> for STAR\*D Cohort

| Race (n)                     | Sex M:F | Yrs. of School | Age         | Initial QIDS | Final QIDS | Final Dose | Cum. Side Effects |
|------------------------------|---------|----------------|-------------|--------------|------------|------------|-------------------|
| White (990)                  | 406:584 | 14.1 ± 3.2     | 43.2 ± 13.4 | 16.1 ± 3.2   | 7.5 ± 5.4  | 20.1 ± 4.0 | 19.1 ± 6.0        |
| Black (157)                  | 65:92   | 13.2 ± 2.8     | 45.5 ± 12.8 | 16.8 ± 3.7   | 8.8 ± 5.8  | 20.1 ± 4.2 | 17.5 ± 5.8        |
| Asian (21)                   | 9:12    | 16.1 ± 3.2     | 32.6 ± 13.9 | 16.5 ± 3.0   | 4.9 ± 3.7  | 21.9 ± 8.1 | 20.9 ± 6.7        |
| American Indian/Alaskan (23) | 11:12   | 14.0 ± 2.6     | 37.4 ± 11.8 | 16.5 ± 3.0   | 7.4 ± 5.3  | 19.3 ± 3.1 | 19.8 ± 7.6        |
| Hawaiian (19)                | 6:13    | 12.7 ± 3.4     | 37.7 ± 10.7 | 17.8 ± 3.2   | 7.4 ± 5.9  | 19.5 ± 2.3 | 18.4 ± 7.9        |
| Mixed/Other (14)             | 6:8     | 14.5 ± 2.4     | 40.0 ± 10.5 | 15.1 ± 2.4   | 9.1 ± 5.6  | 20.0 ± 3.9 | 18.4 ± 6.2        |
| All (1224)                   | 503:721 | 14.0 ± 3.1     | 43.1 ± 13.4 | 16.2 ± 3.3   | 7.6 ± 5.4  | 20.2 ± 4.1 | 19.0 ± 6.1        |

Cum., cumulative; F, female; M, male; QIDS, Quick Inventory of Depressive Symptomatology.

<sup>a</sup>Variables for each covariate are as follows:

Current marital status: married, divorced, never married, separated, widowed, cohabiting

Highest degree obtained: none, GED, high school diploma, associate degree, college diploma, master's degree, doctoral/professional degree

Current employment status: unemployed – looking, unemployed – not looking, part-time, full-time, self-employed, retired – not working

Weight change immediately prior to study entry: Loss (≥-5lbs, >-5≥-2lbs, >-2≥-1lbs), Gain (≥5lbs, >5≥2lbs, >2≥1lbs), No change (0lbs)

Menopausal/post-hysterectomy: menopausal, post-hysterectomy, or male; premenopausal female with no hysterectomy

Treatment-emergent suicidal ideation phenotype: case, control

<sup>b</sup>Pre-existing conditions from the Cumulative Illness Rating Scale and severity (no problem, current mild problem or past significant problem, severe constant significant disability/"uncontrollable" chronic problems, extremely severe/immediate treatment required/end organ failure/sever impairment in function): heart, vascular, haematopoietic, respiratory, eyes/ears/nose/throat/larynx, upper gastrointestinal, lower gastrointestinal, liver, renal, genitourinary, musculoskeletal/integument, neurological, endocrine/metabolic and breast, psychiatric illness (excluding major depressive disorder).

<sup>c</sup>Categories and side effects self-reported on the Patient Rated Inventory of Side Effects: Gastrointestinal (diarrhea, constipation, dry mouth, nausea/vomiting), Heart (palpitations, dizziness on standing, chest pain), Skin (rash, increases perspiration, itching, dry skin), Nervous system (headache, tremors, poor coordination, dizziness), Eyes/Ears (blurred vision, ringing in ears), Genital/Urinary (difficulty urinating, painful urination, frequent urination, menstrual irregularity).

**Table S5.** SNPs Correlated with CpG Methylation in *HTR2A* (See also: Figure 4)

| SNP <sup>a</sup>   | Coordinate (hg18) | $p$ -value                              |                                         |                                         | $r^2$ to rs6311 |       |       |
|--------------------|-------------------|-----------------------------------------|-----------------------------------------|-----------------------------------------|-----------------|-------|-------|
|                    |                   | All                                     | Cauc                                    | AA                                      | All             | Cauc  | AA    |
| 1 - rs622337       | 46325627          | $7.20 \times 10^{-3}$                   | $1.15 \times 10^{-2}$                   | $5.06 \times 10^{-1}$                   | 0.007           | 0.008 | 0.015 |
| 2 - rs655854       | 46326201          | $5.29 \times 10^{-3}$                   | $1.15 \times 10^{-2}$                   | $4.57 \times 10^{-1}$                   | 0.005           | 0.008 | 0.021 |
| 3 - rs2296972      | 46326472          | $3.41 \times 10^{-3}$                   | $1.15 \times 10^{-2}$                   | $1.58 \times 10^{-1}$                   | 0.027           | 0.008 | 0.074 |
| 4 - rs1928042      | 46335217          | $2.93 \times 10^{-3}$                   | $2.48 \times 10^{-2}$                   | $4.49 \times 10^{-2}$                   | 0.236           | 0.237 | 0.232 |
| 5 - rs6561336      | 46346061          | $6.69 \times 10^{-7}$                   | $1.49 \times 10^{-3}$                   | $2.57 \times 10^{-4}$                   | 0.705           | 0.931 | 0.516 |
| 6 - rs972979       | 46347165          | $3.44 \times 10^{-4}$                   | $3.16 \times 10^{-3}$                   | $2.67 \times 10^{-2}$                   | 0.526           | 0.484 | 0.574 |
| 7 - rs1928039      | 46351187          | $7.29 \times 10^{-3}$                   | $9.52 \times 10^{-3}$                   | $2.54 \times 10^{-1}$                   | 0.052           | 0.063 | 0.041 |
| 8 - rs2770304      | 46353366          | $3.05 \times 10^{-3}$                   | $5.20 \times 10^{-4}$                   | $2.91 \times 10^{-1}$                   | 0.438           | 0.411 | 0.469 |
| 9 - rs4942587      | 46360801          | $1.12 \times 10^{-2}$                   | $1.36 \times 10^{-1}$                   | $6.92 \times 10^{-2}$                   | 0.116           | 0.202 | 0.043 |
| 10 - rs4941573     | 46362858          | $9.21 \times 10^{-5}$                   | $1.49 \times 10^{-3}$                   | $5.47 \times 10^{-3}$                   | 0.670           | 0.931 | 0.439 |
| 11 - rs1328684     | 46364231          | $2.68 \times 10^{-4}$                   | $3.00 \times 10^{-2}$                   | $3.39 \times 10^{-3}$                   | 0.348           | 0.389 | 0.304 |
| 12 - rs2296973     | 46364782          | $6.55 \times 10^{-6}$                   | $1.15 \times 10^{-3}$                   | $3.64 \times 10^{-3}$                   | 0.227           | 0.290 | 0.170 |
| 13 - rs2070037     | 46365071          | $4.17 \times 10^{-3}$                   | $1.36 \times 10^{-1}$                   | $1.42 \times 10^{-2}$                   | 0.118           | 0.202 | 0.047 |
| 14 - rs9534511     | 46366581          | $2.40 \times 10^{-7}$                   | $1.22 \times 10^{-3}$                   | $1.15 \times 10^{-4}$                   | 0.441           | 0.596 | 0.311 |
| 15 - rs6313        | 46367941          | $2.79 \times 10^{-7}$                   | $8.27 \times 10^{-4}$                   | $8.29 \times 10^{-5}$                   | 0.954           | 1.000 | 0.904 |
| 16 - rs6312        | 46368825          | $2.23 \times 10^{-3}$                   | $2.16 \times 10^{-2}$                   | $2.64 \times 10^{-2}$                   | 0.090           | 0.052 | 0.133 |
| <b>17 - rs6311</b> | <b>46369479</b>   | <b><math>6.40 \times 10^{-7}</math></b> | <b><math>8.27 \times 10^{-4}</math></b> | <b><math>2.87 \times 10^{-4}</math></b> | -               | -     | -     |
| 18 - rs732821      | 46370880          | $2.87 \times 10^{-7}$                   | $6.40 \times 10^{-4}$                   | $3.11 \times 10^{-4}$                   | 0.618           | 0.870 | 0.422 |
| 19 - rs17289394    | 46371221          | $9.74 \times 10^{-4}$                   | $7.40 \times 10^{-2}$                   | $7.46 \times 10^{-3}$                   | 0.227           | 0.411 | 0.092 |
| 20 - rs4142900     | 46371551          | $1.48 \times 10^{-3}$                   | $7.89 \times 10^{-2}$                   | $1.11 \times 10^{-2}$                   | 0.482           | 0.661 | 0.334 |
| 21 - rs2149434     | 46376345          | $1.11 \times 10^{-2}$                   | $1.21 \times 10^{-2}$                   | $2.88 \times 10^{-1}$                   | 0.379           | 0.469 | 0.284 |
| 22 - rs10507546    | 46381075          | $1.60 \times 10^{-2}$                   | $1.25 \times 10^{-1}$                   | $1.30 \times 10^{-1}$                   | 0.094           | 0.187 | 0.018 |

AA, African American; Cauc, Caucasian; SNP, single nucleotide polymorphism.

<sup>a</sup>Number preceding SNP refers to annotation in Figure 4.

Value in red indicates the proposed functional SNP modulating expression of the extended 5' untranslated region.

**Table S6.** Linkage Disequilibrium Between Functional SNPs and Genome-Wide Human SNP Array 5.0 Surrogate Markers

| Functional SNP / Surrogate | Population    |                  |               |                |
|----------------------------|---------------|------------------|---------------|----------------|
|                            | CEU           |                  | YRI           |                |
|                            | MAF           | $D'$ and $r^2$   | MAF           | $D'$ and $r^2$ |
| rs6311 / rs6313            | 0.450 / 0.450 | 1, 1             | 0.424 / 0.390 | 1, 0.869       |
| rs6314 / rs7323441         | 0.062 / 0.063 | 1, 0.764         | 0.164 / 0.185 | 0.926, 0.799   |
| rs76665058 / rs585719      | 0.000 / 0.183 | N/A <sup>a</sup> | 0.059 / 0.025 | 0.629, 0.163   |

CEU = CEPH (Utah Residents with Northern and Western European Ancestry); YRI = Yoruba in Ibadan, Nigeria.  
 MAF, minor allele frequency; SNP, single nucleotide polymorphism.

<sup>a</sup> Cannot be calculated because rs76665058 is not found in CEU samples

**Table S7.** SNP-SNP Interactions with Baseline QIDS

| rs6313*SNP       | <i>p</i>     | <i>r</i> <sup>2</sup> with rs6314 <sup>a</sup> | <i>D'</i> with rs6314 <sup>a</sup> | rs7323441*SNP | <i>p</i>     | <i>r</i> <sup>2</sup> with rs6311 <sup>a</sup> | <i>D'</i> with rs6311 <sup>a</sup> |
|------------------|--------------|------------------------------------------------|------------------------------------|---------------|--------------|------------------------------------------------|------------------------------------|
| <b>rs7323441</b> | <b>0.011</b> | <b>0.764</b>                                   | <b>1</b>                           | rs4941573     | 0.003        | 1                                              | 1                                  |
| rs2296972        | 0.058        | 0.092                                          | 0.616                              | <b>rs6313</b> | <b>0.011</b> | <b>1</b>                                       | <b>1</b>                           |
| rs2025296        | 0.062        | 0.005                                          | 0.086                              | rs985933      | 0.018        | 0.474                                          | 1                                  |
| rs1923888        | 0.066        | 0.092                                          | 0.616                              | rs1928040     | 0.02         | 0.711                                          | 0.857                              |
| rs1360020        | 0.126        | 0                                              | 0.05                               | rs985934      | 0.021        | 0.474                                          | 1                                  |
| rs1923882        | 0.182        | 0.324                                          | 1                                  | rs582854      | 0.028        | 0.545                                          | 1                                  |
| rs582854         | 0.237        | 0.054                                          | 1                                  | rs4942578     | 0.063        | 0.033                                          | 0.402                              |
| rs1928038        | 0.246        | 0.002                                          | 0.062                              | rs2770297     | 0.07         | 0.31                                           | 1                                  |
| rs1928040        | 0.253        | 0.011                                          | 0.336                              | rs17289854    | 0.082        | 0.176                                          | 0.882                              |
| rs2770299        | 0.275        | 0.001                                          | 1                                  | rs1328685     | 0.096        | 0.099                                          | 1                                  |
| rs1745837        | 0.309        | 0.092                                          | 0.616                              | rs9567739     | 0.096        | 0.004                                          | 0.109                              |
| rs9567739        | 0.336        | 0.189                                          | 1                                  | rs9316232     | 0.106        | 0.004                                          | 0.109                              |
| rs4942578        | 0.387        | 0.001                                          | 0.209                              | rs17359763    | 0.113        | 0.036                                          | 1                                  |
| rs9316232        | 0.392        | 0.189                                          | 1                                  | rs2296972     | 0.135        | 0.002                                          | 0.081                              |
| rs2016711        | 0.405        | 0.005                                          | 1                                  | rs1360020     | 0.144        | 0.703                                          | 0.959                              |
| rs1328683        | 0.409        | 0.002                                          | 0.084                              | rs666693      | 0.16         | 0.174                                          | 1                                  |
| rs4941573        | 0.445        | 0.002                                          | 0.142                              | rs1002513     | 0.176        | 0.174                                          | 1                                  |
| rs2770297        | 0.452        | 0.006                                          | 0.171                              | rs1928038     | 0.178        | 0.036                                          | 1                                  |
| rs1328685        | 0.564        | 0                                              | 0.008                              | rs1923888     | 0.21         | 0.002                                          | 0.081                              |
| rs582385         | 0.618        | 0.017                                          | 1                                  | rs17289304    | 0.247        | 0.099                                          | 1                                  |
| rs985934         | 0.656        | 0.001                                          | 0.094                              | rs1328683     | 0.254        | 0.205                                          | 1                                  |
| rs985933         | 0.679        | 0.001                                          | 0.094                              | rs1923882     | 0.299        | 0.001                                          | 0.053                              |
| rs9595550        | 0.706        | N.D.                                           | N.D                                | rs9595550     | 0.353        | N.D.                                           | N.D                                |
| rs6316           | 0.713        | N.D.                                           | N.D                                | rs6316        | 0.365        | N.D.                                           | N.D                                |
| rs7335733        | 0.733        | N.D.                                           | N.D                                | rs7330205     | 0.371        | N.D.                                           | N.D                                |
| rs4942577        | 0.736        | 0.035                                          | 1                                  | rs7334093     | 0.371        | N.D.                                           | N.D                                |
| rs17289854       | 0.755        | 0.013                                          | 0.776                              | rs2016711     | 0.375        | 0.051                                          | 1                                  |
| rs9595549        | 0.757        | N.D.                                           | N.D                                | rs9595546     | 0.378        | N.D.                                           | N.D                                |
| rs666693         | 0.761        | 0.017                                          | 1                                  | rs9526245     | 0.388        | 0.226                                          | 1                                  |
| rs9595546        | 0.77         | N.D.                                           | N.D                                | rs9595549     | 0.408        | N.D.                                           | N.D                                |
| rs7330205        | 0.771        | N.D.                                           | N.D                                | rs1745837     | 0.416        | 0.002                                          | 0.081                              |
| rs7334093        | 0.772        | N.D.                                           | N.D                                | rs2025296     | 0.469        | 0.099                                          | 1                                  |
| rs977003         | 0.858        | 0.09                                           | 1                                  | rs582385      | 0.474        | 0.174                                          | 1                                  |
| rs17359763       | 0.868        | 0.004                                          | 1                                  | rs7335733     | 0.521        | N.D.                                           | N.D                                |
| rs17289304       | 0.89         | 0                                              | 0.008                              | rs977003      | 0.578        | 0.009                                          | 0.102                              |
| rs1002513        | 0.915        | 0.017                                          | 1                                  | rs4942577     | 0.742        | 0.03                                           | 0.295                              |
| rs9526245        | 0.935        | 0                                              | 0.023                              | rs2770299     | 0.875        | 0.007                                          | 1                                  |

N.D., not determined; QIDS, Quick Inventory of Depressive Symptomatology; SNP, single nucleotide polymorphism.

<sup>a</sup>Calculated in HapMap CEU population.

Values in red indicate SNPs genotyped in STAR\*D that are surrogates for proposed functional variants.

### Supplemental References

1. Kent WJ, Sugnet CW, Furey TS, Roskin KM, Pringle TH, Zahler AM, *et al.* (2002): The human genome browser at UCSC. *Genome Res.* 12: 996-1006.
2. Shih JC, Zhu Q, Chen K (1996): Determination of transcription initiation sites and promoter activity of the human 5-HT<sub>2A</sub> receptor gene. *Behav Brain Res.* 73: 59-62.
3. Zhu QS, Chen K, Shih JC (1995): Characterization of the human 5-HT<sub>2A</sub> receptor gene promoter. *J Neurosci.* 15: 4885-4895.
4. Down TA, Hubbard TJ (2002): Computational detection and location of transcription start sites in mammalian genomic DNA. *Genome Res.* 12: 458-461.
